# Supplementary material for: Integrated Genomic and Transcriptomic Elucidation of Flowering in Garlic
Source: MDPI journal article supplement (doi:10.3390/ijms232213876), 2022-11-10
Supplement: s1 [file s1]

```

      10      20      30      40      50      60
TFL1.1  -----MA RATDTLVVGR VIGEVLDNFS PSVKIVVTYN SNKLVCSGHE FFPSIVAPKP
TFL1.2  -----MA RATDTLVVGR VIGEVLDNFS PSVKIVVTYN SNKLVCSGHE FFPSIVAPKP
TFL1.3  -----MA RATDTLVVGR VIGEVLDNFS PSVKIVVTYN SNKLVCSGHE FFPSIVAPKP
TFL1.5  -----MARA RATGTLAVGR VIGEVLENFN PSKIVVTYN TNKLVCSGHE FFPSVAPKP
TFL1.4  NSPIKLISMA RATRTLAVGR VIGEVLENFN PSVKIVVTYN SNKLVCSGHE FFPSVASKP
CEN      -----MS RVMDPLSVGR VIGDVMDAFD PSVKMVVSYG T-KQVYNGHE LMPAVVCSKP

      70      80      90      100     110     120
TFL1.1  RVEVQGGDLR SFFTLVMTDP DVPGPSDPYL REHLHWYKTY PDHVFYFA-----
TFL1.2  RVEVQGGDLR SFFTLVMTDP DVPGPSDPYL REHLHWIVTD IPGTTDASF-----
TFL1.3  RVEVQGGDLR SFFTLVMTDP DVPGPSDPYL REHLHWIVTD IPGTTDASF-----
TFL1.5  RVEVQGGDLR SFFTLVMTDP DVPGPSDPYL REHLHWIVTD IPGTTDASFG EHFPSFIYPS
TFL1.4  RVEVQGGDLR SFFTLVMTDP DVPGPSDPYL REHLHWYKTY I-----
CEN      KVEIGDDMR SSYALVMTDP DAPSPSDPCL REHLHWLVYK HLYTYCTEFG-----

      130     140     150     160     170     180
TFL1.1  ----- -RREVVNYES PRPNIGIHRF VFVLFKQKKR NSVSSPGVRD
TFL1.2  ----- -GREVVNYES PRPNIGIHRF VFVLFKQKKR NSVSSPGVRD
TFL1.3  ----- -GREVVNYES PRPNIGIHRF VFVLFKQKKR NSVSSPGVRD
TFL1.5  STYMTQKDKI MNDIYDYSF VGREVVNYES PRPYIGIHRF VFVLFKQKKR NSVSSPGVRD
TFL1.4  ----- -YMIFF SGREVVSYEA PRPVIGIHRF VFVLFKQKSR NTARAPQSRD
CEN      ----- -YMIFF SGREVVSYEA PRPVIGIHRF VFVLFKQKSR NTARAPQSRD

      190     200     210
TFL1.1  RFNTRQFAEK NELGLPVAAV YFNAQRETAA RRR
TFL1.2  RFNTRQFAEK NELGLPVAAV YFNAQRETAA RRR
TFL1.3  RFNTRLFAEK NELGLPVAAV YFNAQRETAA RRR
TFL1.5  RFNTRQFAEK NELGLPVAAV YFNAQRETAA RRR
TFL1.4  ----- -RS
CEN      CFNTRNFAVE NGLGLPVAAV FFNCQRETAC RRR

```

**Figure S1:** Amino acid sequence alignment of six representatives of the TFL-like clade in garlic genome.

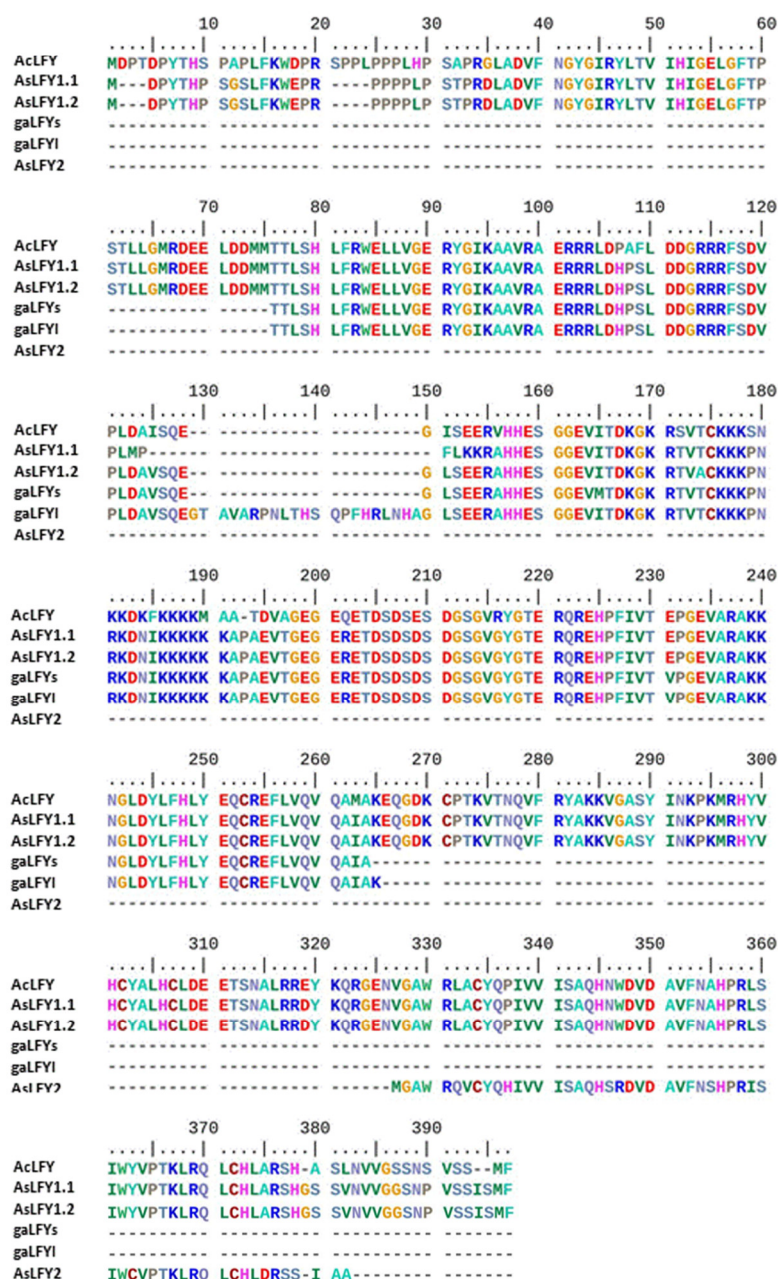

**Figure S2:** Amino acid sequence alignment of *LFY* homologs from garlic (As) and onion (Ac). Two spliced transcripts, previously reported as *gaLFYl* and *gaLFYs* [13], have high homology with *AsLFY1*.

Table S1: Homologs of the main known flowering-related genes discovered in garlic genome.

**Table S2:** Sequences of FT and LFY proteins of different species downloaded from the NCBI database (<https://www.ncbi.nlm.nih.gov/>, accessed on 15 February 2021).

| Name     | Accession      |
|----------|----------------|
| AcCEN    | AOP17764.1     |
| AcFT1    | AGZ20207.1     |
| AcFT2    | AGZ20208.1     |
| AcFT3    | AGZ20209.1     |
| AcFT4    | AGZ20210.1     |
| AcFT5    | AGZ20211.1     |
| AcFT6    | AGZ20212.1     |
| AcFT7    | Asa7G06501.1   |
| AcTFL1   | AOP17765.1     |
| AsCEN    | Asa4G03276.1   |
| AsFT1.1  | Asa7G06383.1   |
| AsFT1.2  | Asa7G06386.1   |
| AsFT10   | Asa7G06404.1   |
| AsFT11   | Asa6G01542.1   |
| AsFT2.1  | Asa6G06199.1   |
| AsFT2.2  | Asa6G06200.1   |
| AsFT3.1  | Asa6G00732.1   |
| AsFT3.2  | Asa6G01063.1   |
| AsFT4.1  | Asa6G00187.1   |
| AsFT4.2  | Asa6G00188.1   |
| AsFT4.3  | Asa8G01025.1   |
| AsFT4.4  | Asa8G01036.1   |
| AsFT5.1  | Asa0G05138.1   |
| AsFT5.2  | Asa8G04470.1   |
| AsFT6.1  | Asa2G02821.1   |
| AsFT6.2  | Asa7G06501.1   |
| AsFT8.1  | Asa5G01472.1   |
| AsFT8.2  | Asa6G04367.1   |
| AsFT9.1  | Asa2G04443.1   |
| AsFT9.2  | Asa2G04445.1   |
| AsTFL1.1 | Asa5G02970.1   |
| AsTFL1.2 | Asa5G02971.1   |
| AsTFL1.3 | Asa5G02972.1   |
| AsTFL1.4 | Asa0G01615.1   |
| AsTFL1.5 | Asa4G04758.1   |
| AtBFT    | NP_201010.1    |
| AtCEN    | NP_180324.1    |
| AtFT     | NP_001320342.1 |
| AtMFT    | NP_173250.1    |
| AtTFL1   | NP_196004.1    |
| AtTSF    | NP_193770.1    |

|        |                |
|--------|----------------|
| BdFT   | XP_003564300.1 |
| BdFT   | XP_003565602.1 |
| BdFT   | XP_003575305.1 |
| BdFT   | XP_003580019.1 |
| BdFT   | XP_003576940.1 |
| BdFT   | XP_010238354.1 |
| BdFT   | XP_003563772.1 |
| BdFT   | XP_003571147.1 |
| BdFT   | XP_003568088.1 |
| BdFT   | XP_003569807.1 |
| BdMFT  | XP_003566347.1 |
| BdMFT  | XP_003568618.1 |
| BdMFT  | XP_024312894.1 |
| BdTFL1 | XP_003575068.1 |
| BdTFL1 | XP_003579695.1 |
| BdTFL1 | XP_003578901.1 |
| BdTSF  | XP_010238588.1 |
| BdTSF  | XP_003578751.1 |
| OsFT   | XP_015640513.1 |
| OsFT   | XP_015641951.1 |
| OsFT   | XP_015642519.1 |
| OsFT   | XP_015611892.1 |
| OsFT   | XP_015627229.1 |
| OsFT   | XP_015633387.1 |
| OsFT   | XP_015617569.1 |
| OsFT   | XP_015611907.1 |
| OsFT   | XP_015641828.1 |
| OsFT   | XP_015624852.1 |
| OsFT   | XP_015630200.1 |
| OsMFT  | XP_015641734.1 |
| OsMFT2 | NP_001359127.1 |
| OsTFL1 | XP_015624118.1 |
| OsTFL1 | XP_015634144.1 |
| OsTFL1 | XP_015618522.1 |
| OsTFL1 | XP_025876956.1 |
| OsTSF  | XP_015619436.1 |
